# Supplementary material
Source: PubMed Central journal article supplement (PMC5816173)
Supplement: pnas.1716452115.sapp.pdf [file pnas.1716452115.sapp.pdf]

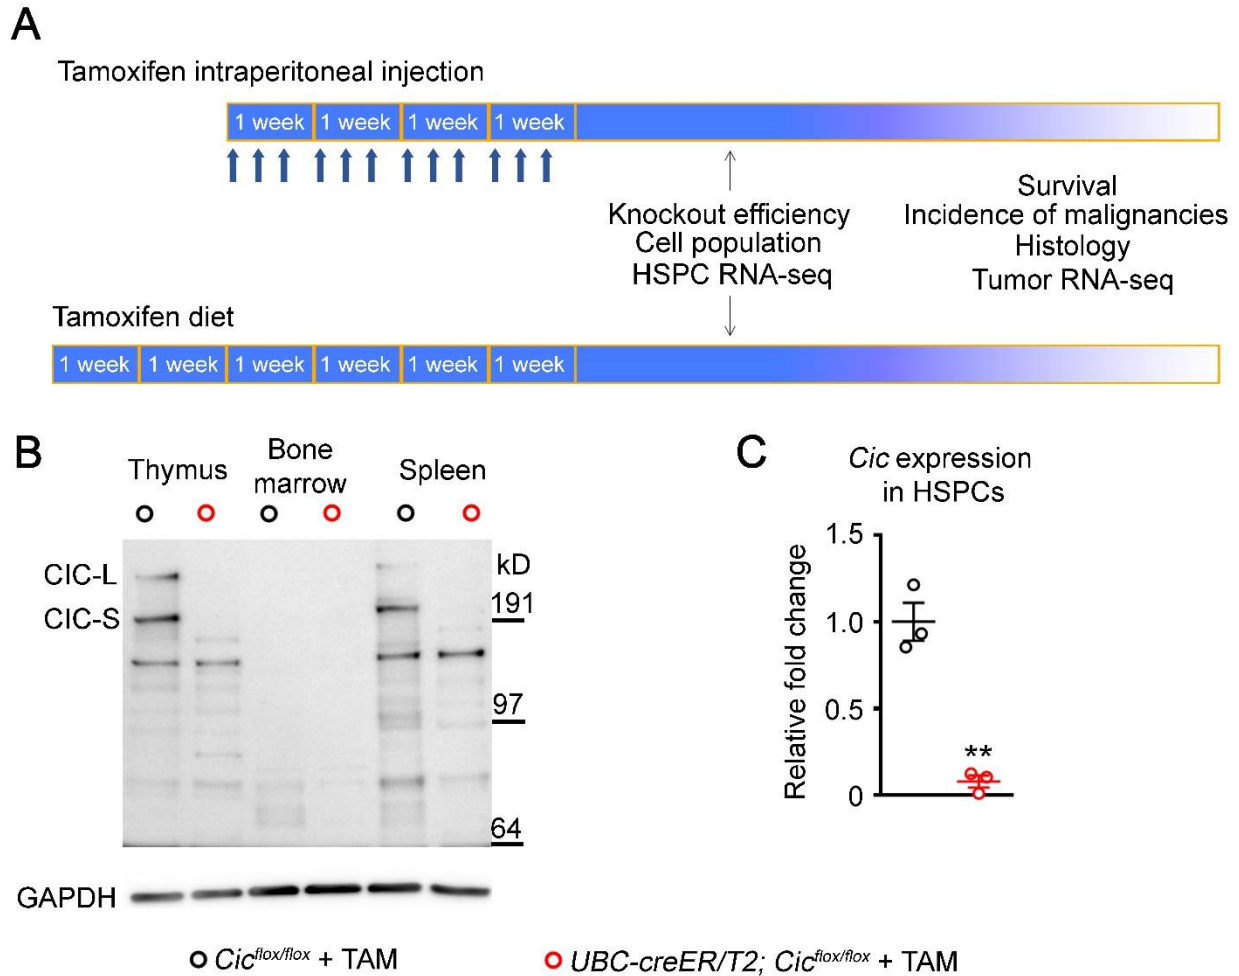

**Fig. S1.** Tamoxifen treatments and Cre-mediated knockout efficiency of *Cic*. (A) Two regimens of tamoxifen treatments. *Cic*<sup>fl<sup>ox</sup>/fl<sup>ox</sup></sup> and *UBC-cre/ERT2; Cic*<sup>fl<sup>ox</sup>/fl<sup>ox</sup></sup> mice at 8-12 weeks of age were given tamoxifen via intraperitoneal injection for four weeks, or mice at 6-10 weeks of age were fed a tamoxifen diet for six weeks. (B) Western blot showing CIC-L and CIC-S isoforms were deleted from the thymus and spleens of *UBC-cre/ERT2; Cic*<sup>fl<sup>ox</sup>/fl<sup>ox</sup></sup> mice two weeks post tamoxifen (TAM) treatment. (C) Quantitative PCR of *Cic* expression in hematopoietic stem and progenitor cells (HSPCs, defined as Lineage<sup>-</sup> Sca-1<sup>+</sup> c-Kit<sup>+</sup>) (n = 3 animals). Data are presented in scatter plots with error bars representing mean ± SEM. Statistical analysis was performed using a two-tailed unpaired t test. \*\*, *P* < 0.01.

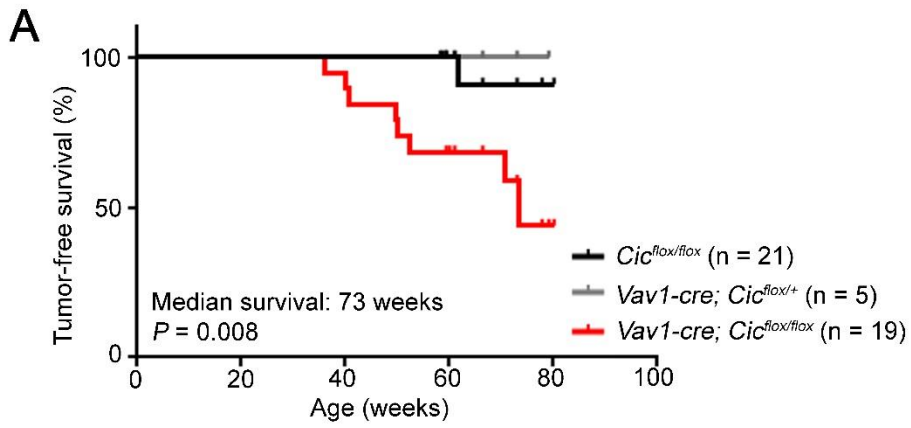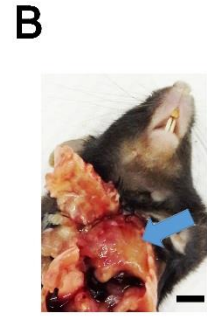

**C**  $Cic$  expression in HSPCs

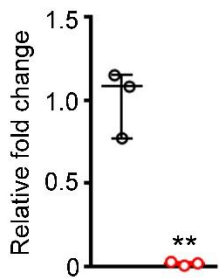

**D**

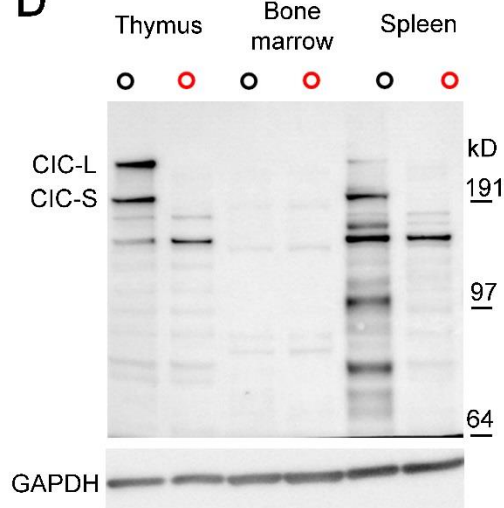

○  $Cic^{flox/flox}$       ○  $Tek-cre; Cic^{flox/flox}$

**E**

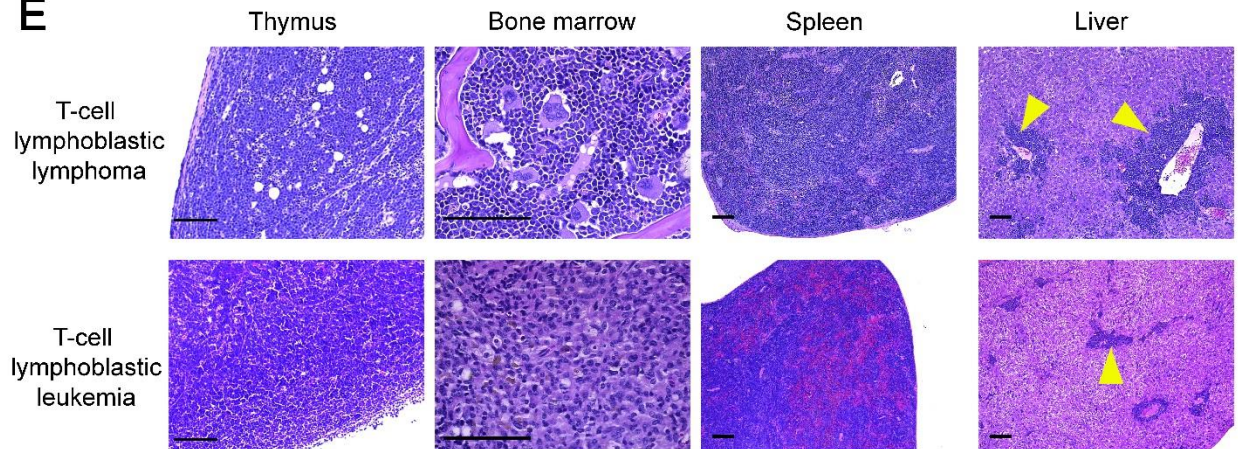

**Fig. S2.** Loss of *Cic* in hematopoietic cells causes T-cell lymphoblastic leukemia/lymphoma (T-ALL). (A) Tumor-free survival of *Vav1-cre; Cic<sup>lox/lox</sup>* mice. (B) Representative image of a lymphoma found in the *Vav1-cre; Cic<sup>lox/lox</sup>* mice. Arrow points to the tumor. Scale bar = 0.5 cm. (C) Quantitative PCR of *Cic* expression in hematopoietic stem and progenitor cells (HSPCs) from *Cic<sup>lox/lox</sup>* and *Tek-cre; Cic<sup>lox/lox</sup>* mice (n = 3 animals). Data are presented in scatter plots with error bars representing mean  $\pm$  SEM. Statistical analysis was performed using two-tailed unpaired t test. \*\*,  $P < 0.01$ . (D) Western blot showing CIC-L and CIC-S isoforms were deleted from the thymus and spleens of *Tek-cre; Cic<sup>lox/lox</sup>* mice. (E) Histology of a *Tek-cre; Cic<sup>lox/lox</sup>* mouse with T-cell lymphoblastic lymphoma (upper panels) and one with T-cell lymphoblastic leukemia (lower panels). Arrowheads point to malignant lymphocytes in the liver. Scale bars = 100  $\mu$ m.

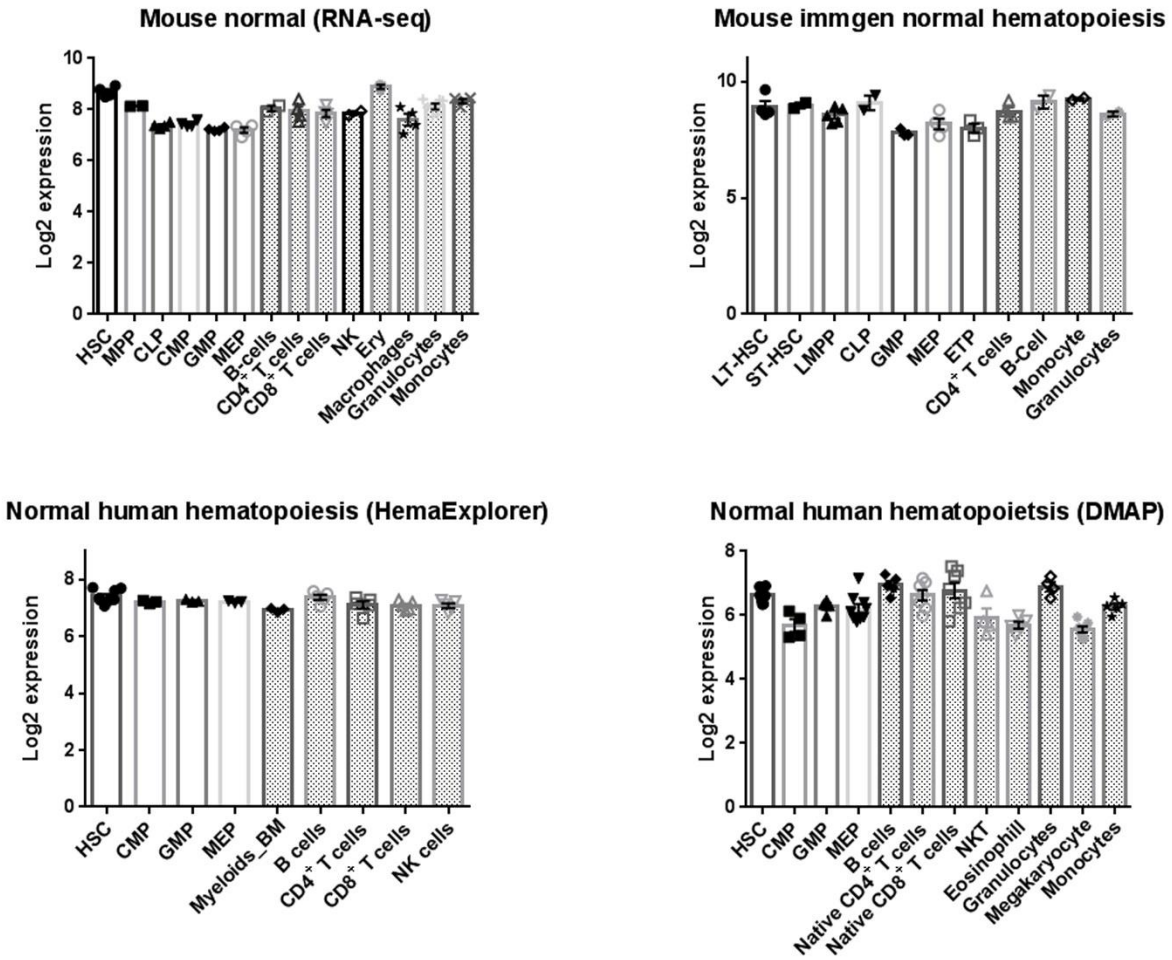

**Fig. S3.** *CIC* gene expression during normal hematopoiesis in mice and humans. Expression data were extracted from the BloodSpot database.

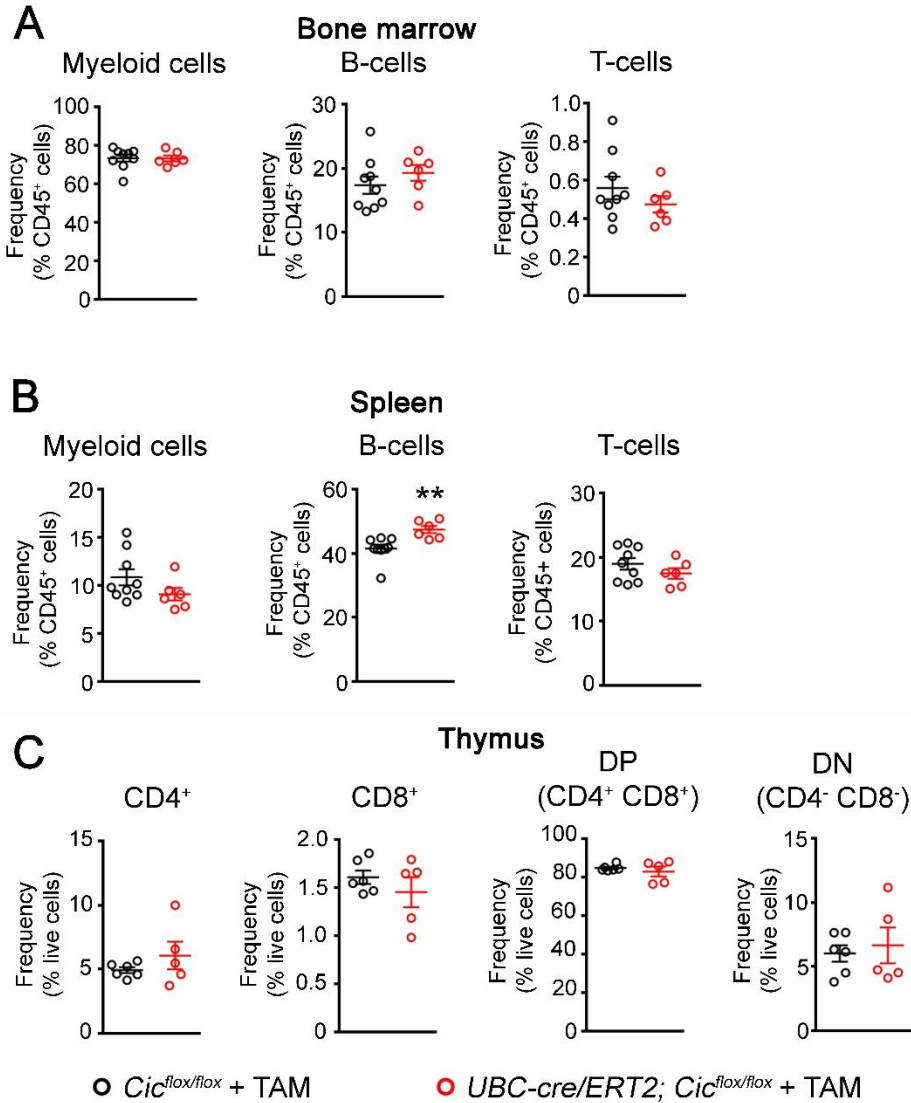

**Fig. S4.** Flow cytometry analyses of hematopoietic cells in the *UBC-cre/ERT2; Cic<sup>flox/flox</sup>* mice two weeks post tamoxifen treatment. (A) Lineage analyses of the bone marrow. (B) Lineage analyses of the spleen. (C) T-cell analyses of the thymus. Myeloid cells, Mac-1<sup>+</sup> (CD11b<sup>+</sup>) or Gr-1<sup>+</sup>; B cells, B220<sup>+</sup>; T cells, CD4<sup>+</sup> or CD8<sup>+</sup>; DP, double positive (CD4<sup>+</sup> CD8<sup>+</sup>); DN, double negative (CD4<sup>-</sup> CD8<sup>-</sup>). Data are presented in scatter plots with error bars representing mean  $\pm$  SEM (n = 5-6 animals). Statistical analysis was performed using two-tailed unpaired t test. \*\*,  $P < 0.01$ .

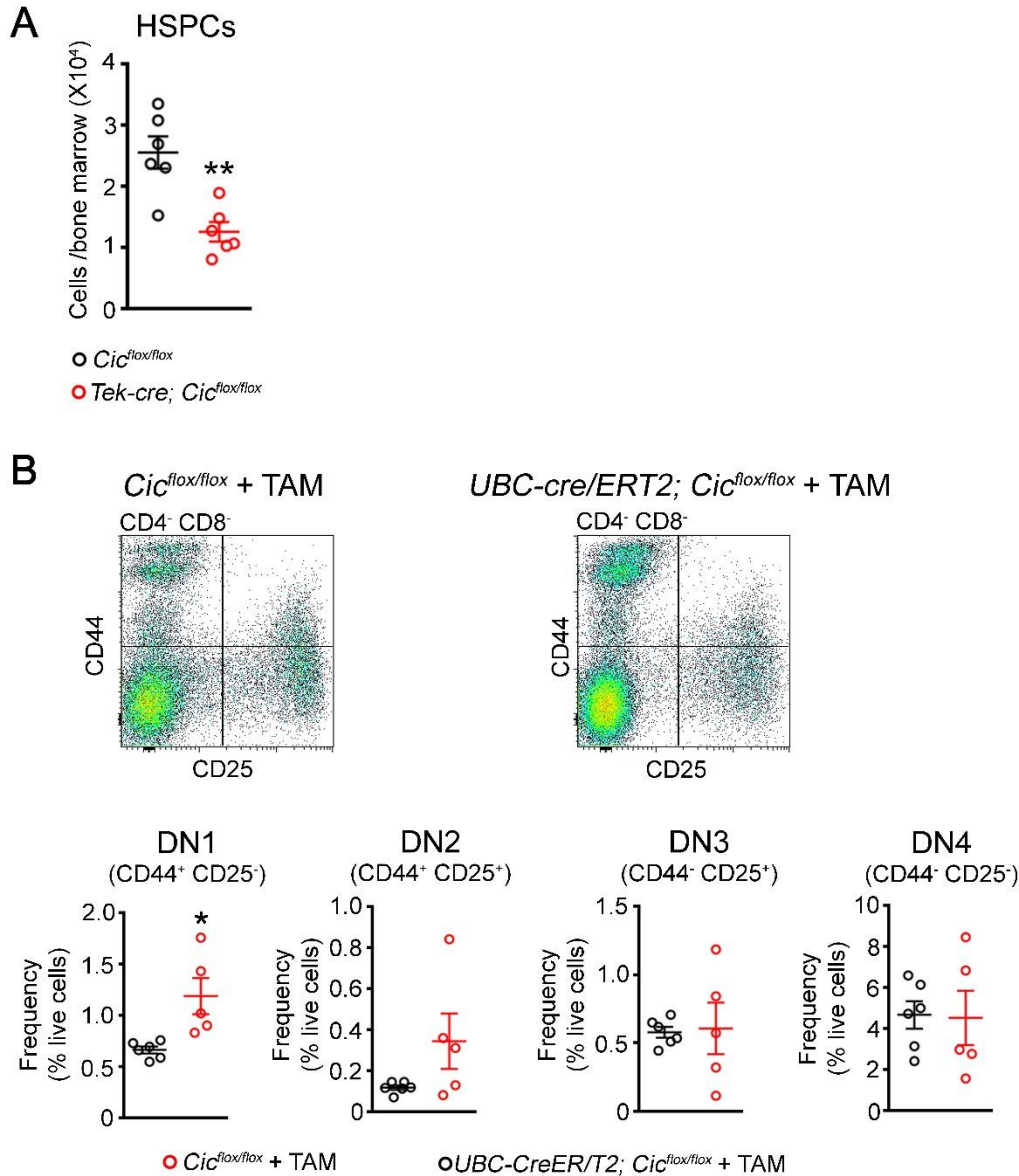

**Fig. S5.** Loss of CIC disrupts the homeostasis of progenitor cells. (A) Analysis of hematopoietic stem and progenitor cells (HSPCs, Lineage<sup>-</sup> c-Kit<sup>+</sup> Sca-1<sup>+</sup>) in 12-week old  $Cic^{flox/flox}$  and  $Tek\text{-}cre; Cic^{flox/flox}$  mice ( $n = 6$  animals). (C) Analysis of CD4<sup>-</sup> CD8<sup>-</sup> double negative (DN) compartments in the thymus from  $Cic^{flox/flox}$  and  $UBC\text{-}cre/ERT2; Cic^{flox/flox}$  mice two weeks post tamoxifen treatment ( $n = 5\text{-}6$  animals). Representative flow cytometry data are shown at the top panel. Please note that these analyses were performed using a separate cohort of animals from those presented in **Fig. 3**. The increase in DN1 frequency in the  $Cic$  adult knockout mice was observed

in both cohorts. Data are presented in scatter plots with error bars representing mean  $\pm$  SEM.

Statistical analyses were performed using two-tailed unpaired t test. \*:  $P < 0.05$ ; \*\*:  $P < 0.01$ .

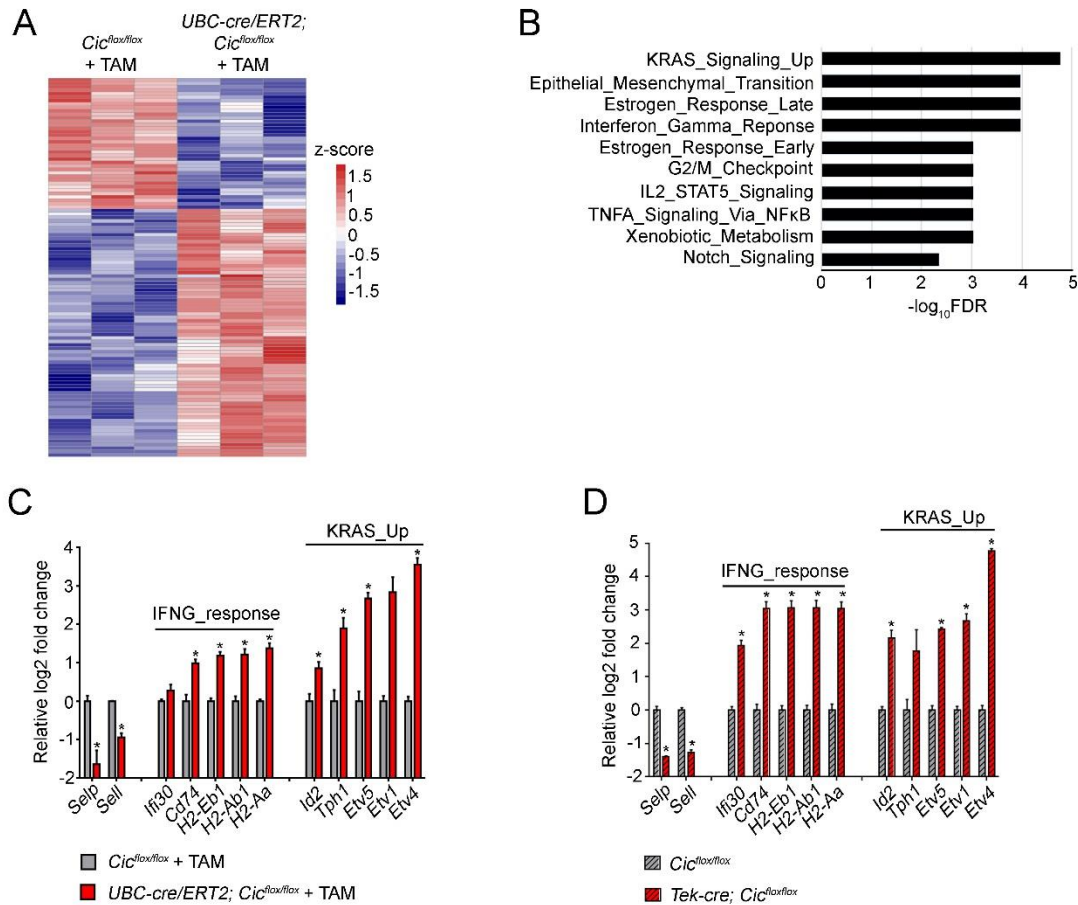

**Fig. S6.** Gene expression profiling of hematopoietic stem and progenitor cells (HSPCs) from *Cic* adult knockout mice and controls. (A) Heatmap showing clustering of differentially expressed genes (DEGs, FDR < 0.05) from the RNA-seq study. HSPCs were isolated two weeks post tamoxifen treatment (n = 3). (B) Top 10 hallmark gene sets that showed significant overlap with the up-regulated genes in HSPCs from *Cic* adult knockout mice. (C) Quantitative PCR validating DEGs from the RNA-seq study (n = 3 animals). KRAS\_Up, genes upregulated by KRAS activation. IFNG\_response, genes up-regulated in response to interferon gamma. (D) Quantitative PCR showing similar gene expression changes in the HSPCs from 12-week old *Tek-cre; Cic<sup>lox/flox</sup>* mice (n = 3 animals). Error bars represent mean + SEM. Statistical analyses were performed using multiple t tests with a false discovery rate (FDR) approach. \*: FDR < 0.05.



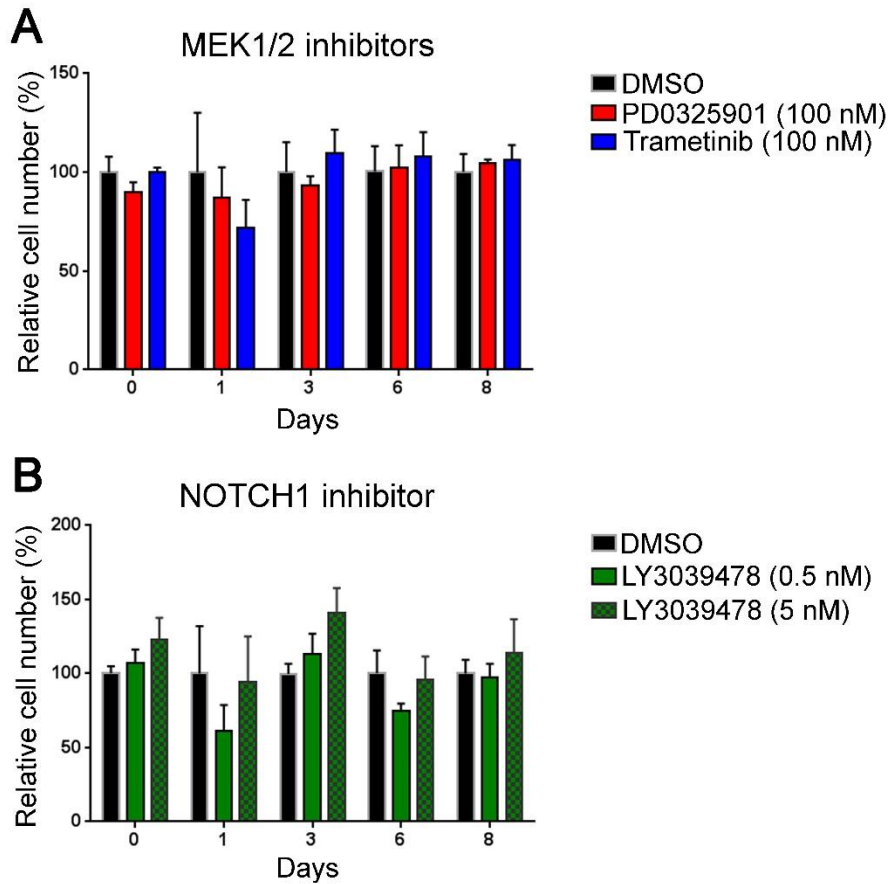

**Fig. S7.** *Cic*-null tumors are insensitive to MAPK and NOTCH1 inhibition. Treatment of cultured *Cic*-null tumor cells with inhibitors for MEK1/2 (A), or a NOTCH1 inhibitor (B). Error bars represent mean  $\pm$  SEM. Four technical repeats for each treatment. Statistical analyses were performed using regular two-way ANOVA with Turkey's correction for multiple comparisons.

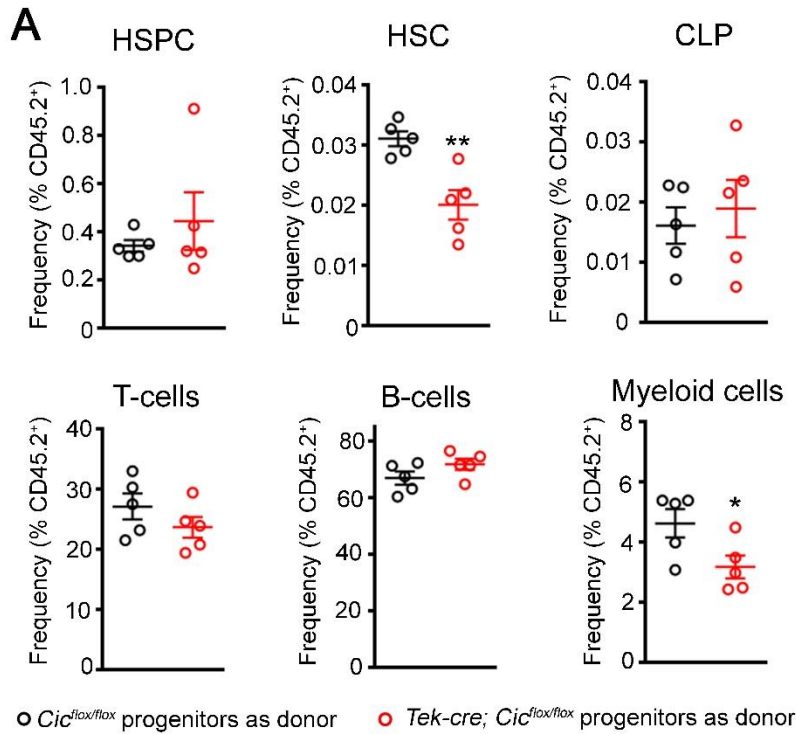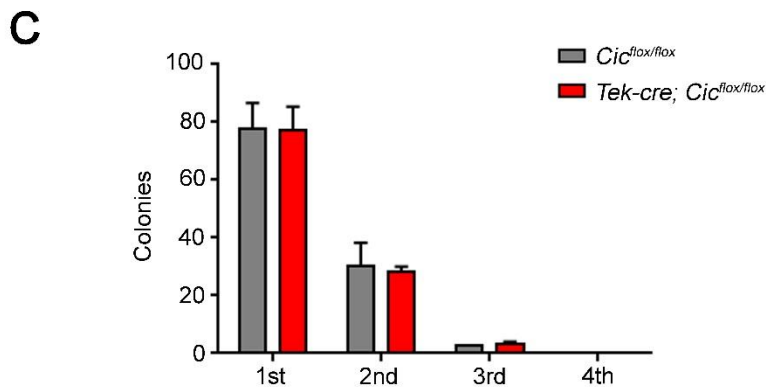

**Fig. S8.** *Cic*-knockout progenitors show slightly reduced ability to generate mature myeloid cells *in vivo*. (A) *Cic<sup>flox/flox</sup>* or *Tek-cre; Cic<sup>flox/flox</sup>* progenitors (both CD45.2) were transplanted into wildtype CD45.1 recipients. The frequencies of hematopoietic stem and progenitor cells (HSPC), hematopoietic stem cells (HSC), common lymphoid progenitors (CLP) in the bone marrow, as well as T-cells, B-cells and Myeloid cells in the peripheral blood were analyzed eight weeks after transplantation. (B) Colony-forming unit assay plating 1000 *Cic<sup>flox/flox</sup>* or *Tek-cre; Cic<sup>flox/flox</sup>* c-Kit<sup>+</sup> cells. Every seven days colonies were counted and 1000 cells were re-plated up to four

rounds of plating. Results were plotted as mean  $\pm$  SEM. Statistical analyses were performed using two-tailed unpaired t tests. \*:  $P < 0.05$ ; \*\*:  $P < 0.01$ .

| Tumor ID | Tumor-free survival age (weeks post tamoxifen treatment) | Tumor immunophenotype                                                          | T-cell lymphoblastic lymphoma or leukemia                                                                              |
|----------|----------------------------------------------------------|--------------------------------------------------------------------------------|------------------------------------------------------------------------------------------------------------------------|
| KO-1     | 56                                                       | 75% CD4 <sup>+</sup> ; 25% CD4 <sup>+</sup> CD8 <sup>+</sup>                   | T-cell lymphoblastic lymphoma                                                                                          |
| KO-2     | 33                                                       | 70% CD4 <sup>+</sup> ; 30% CD4 <sup>+</sup> CD8 <sup>+</sup>                   | T-cell lymphoblastic leukemia; 71% CD4 <sup>+</sup> ; 28% CD4 <sup>+</sup> CD8 <sup>+</sup> T-cells in the bone marrow |
| KO-3     | 27                                                       | CD4 <sup>+</sup> CD8 <sup>+</sup>                                              | T-cell lymphoblastic lymphoma                                                                                          |
| KO-4     | 20                                                       | CD4 <sup>+</sup>                                                               | T-cell lymphoblastic lymphoma                                                                                          |
| KO-5     | 21                                                       | CD4 <sup>+</sup>                                                               | T-cell lymphoblastic leukemia; 65% CD4 <sup>+</sup> T-cells in the bone marrow                                         |
| KO-6     | 21                                                       | CD4 <sup>+</sup> CD8 <sup>+</sup>                                              | T-cell lymphoblastic lymphoma                                                                                          |
| KO-7     | 26                                                       | 40% CD4 <sup>+</sup> CD8 <sup>+</sup> ; 60% CD8 <sup>+</sup>                   | T-cell lymphoblastic lymphoma                                                                                          |
| KO-8     | 39                                                       | Not determined. Histological findings confirmed T-cell lymphoblastic lymphoma. | T-cell lymphoblastic lymphoma                                                                                          |

**Supplemental Table S1.** Summary of eight tumors from the *UBC-cre/ERT2; Cic<sup>flox/flox</sup>* mice treated with tamoxifen.

| <b>Tumor ID</b> | <b>Tumor-free survival age</b> | <b>Tumor immunophenotype</b>                                                   | <b>T-cell lymphoblastic lymphoma or leukemia</b> |
|-----------------|--------------------------------|--------------------------------------------------------------------------------|--------------------------------------------------|
| TKO 1           | 62                             | CD4 <sup>+</sup>                                                               | T-cell lymphoblastic leukemia                    |
| TKO 2           | 37                             | CD4 <sup>+</sup>                                                               | T-cell lymphoblastic lymphoma                    |
| TKO 3           | 60                             | 50% CD4 <sup>+</sup> , 50% CD4 <sup>+</sup> CD8 <sup>+</sup>                   | T-cell lymphoblastic lymphoma                    |
| TKO 4           | 45                             | CD4 <sup>+</sup> CD8 <sup>+</sup>                                              | T-cell lymphoblastic lymphoma                    |
| TKO 5           | 44                             | CD4 <sup>+</sup> CD8 <sup>+</sup>                                              | T-cell lymphoblastic lymphoma                    |
| TKO 6           | 69                             | Not determined. Histological findings confirmed T-cell lymphoblastic lymphoma. | T-cell lymphoblastic lymphoma                    |
| TKO 7           | 40                             | Not determined. Histological findings confirmed T-cell lymphoblastic lymphoma. | T-cell lymphoblastic lymphoma                    |
| TKO 8           | 56                             | Not determined. Histological findings confirmed T-cell lymphoblastic lymphoma. | T-cell lymphoblastic lymphoma                    |

**Supplemental Table S2.** Summary of eight tumors from the *Tek-cre; Cic<sup>flox/flox</sup>* mice.

| Tumor ID | Tumor-free survival age (weeks post tamoxifen treatment) | Tumor immunophenotype                                                          | T-cell lymphoblastic lymphoma or leukemia |
|----------|----------------------------------------------------------|--------------------------------------------------------------------------------|-------------------------------------------|
| BMTP-1   | 43                                                       | CD4 <sup>+</sup>                                                               | T-cell lymphoblastic lymphoma             |
| BMTP-2   | 30                                                       | CD4 <sup>+</sup> CD8 <sup>+</sup>                                              | T-cell lymphoblastic lymphoma             |
| BMTP-3   | 26                                                       | CD4 <sup>+</sup> CD8 <sup>+</sup>                                              | T-cell lymphoblastic lymphoma             |
| BMTP-4   | 25                                                       | CD4 <sup>+</sup> CD8 <sup>+</sup>                                              | T-cell lymphoblastic lymphoma             |
| BMTP-5   | 27                                                       | Not determined. Histological findings confirmed T-cell lymphoblastic lymphoma. | T-cell lymphoblastic lymphoma             |
| BMTP-6   | 30                                                       | Not determined. Histological findings confirmed T-cell lymphoblastic lymphoma. | T-cell lymphoblastic lymphoma             |
| BMTP-7   | 30                                                       | Not determined. Histological findings confirmed T-cell lymphoblastic lymphoma. | T-cell lymphoblastic lymphoma             |
| BMTP-8   | 19                                                       | Not determined. Histological findings confirmed T-cell lymphoblastic lymphoma. | T-cell lymphoblastic lymphoma             |
| BMTP-9   | 27                                                       | Not determined. Histological findings confirmed T-cell lymphoblastic lymphoma. | T-cell lymphoblastic lymphoma             |

**Supplemental Table S3.** Summary of nine tumors from the wildtype mice transplanted with progenitor cells from *UBC-cre/ERT2*; *Cic<sup>flox/flox</sup>* mice and treated with tamoxifen.

| Genotype/description                                                                                            | Tumor immunophenotype      | Notch1 (uc008ivl.2) |         |         |         | Kras (uc009erh.2) |        |        | Nras (uc008qsm.1) |        |        | Pten (uc008hfr.1) |        |        |        |
|-----------------------------------------------------------------------------------------------------------------|----------------------------|---------------------|---------|---------|---------|-------------------|--------|--------|-------------------|--------|--------|-------------------|--------|--------|--------|
|                                                                                                                 |                            | Exon 26             | Exon 27 | Exon 28 | Exon 34 | Exon 2            | Exon 3 | Exon 4 | Exon 2            | Exon 3 | Exon 4 | Exon 5            | Exon 6 | Exon 7 | Exon 8 |
| <i>UBC-cre/ERT2</i> ;<br><i>Cic<sup>flx/flx</sup></i> + TAM                                                     | 50% CD4+; 15%<br>CD4+ CD8+ | -                   | -       | -       | -       | -                 | -      | -      | -                 | -      | -      | -                 | -      | -      | -      |
| <i>UBC-cre/ERT2</i> ;<br><i>Cic<sup>flx/flx</sup></i> + TAM                                                     | 70% CD4+; 30%<br>CD4+ CD8+ | -                   | -       | -       | -       | -                 | -      | -      | -                 | -      | -      | -                 | -      | -      | -      |
| <i>UBC-cre/ERT2</i> ;<br><i>Cic<sup>flx/flx</sup></i> + TAM                                                     | CD4+ CD8+                  | -                   | -       | -       | S2407fs | -                 | -      | -      | -                 | -      | -      | -                 | -      | -      | -      |
| <i>UBC-cre/ERT2</i> ;<br><i>Cic<sup>flx/flx</sup></i> as donor cells<br>in bone marrow<br>transplantation + TAM | CD4+                       | -                   | -       | -       | -       | -                 | -      | -      | -                 | -      | -      | -                 | -      | -      | -      |
| <i>UBC-cre/ERT2</i> ;<br><i>Cic<sup>flx/flx</sup></i> as donor cells<br>in bone marrow<br>transplantation + TAM | CD4+ CD8+                  | -                   | -       | -       | R2361fs | -                 | -      | -      | -                 | -      | -      | -                 | -      | -      | -      |
| <i>UBC-cre/ERT2</i> ;<br><i>Cic<sup>flx/flx</sup></i> as donor cells<br>in bone marrow<br>transplantation + TAM | CD4+ CD8+                  | -                   | -       | -       | -       | -                 | -      | -      | -                 | -      | -      | -                 | Q171L  | -      | -      |

| Genotype/description                                                                                            | Tumor immunophenotype      | Idh1 (uc007bhn.2) | Flt3 (uc009aob.2) |         |         | Ptpn11 (uc008zio.2) |         | Fbxw7 (uc008pqk.2) |         |         |         |         |         |   |
|-----------------------------------------------------------------------------------------------------------------|----------------------------|-------------------|-------------------|---------|---------|---------------------|---------|--------------------|---------|---------|---------|---------|---------|---|
|                                                                                                                 |                            | Exon 3            | Exon 13           | Exon 14 | Exon 20 | Exon 3              | Exon 13 | Exon 9             | Exon 10 | Exon 11 | Exon 12 | Exon 13 | Exon 14 |   |
| <i>UBC-cre/ERT2</i> ;<br><i>Cic<sup>flx/flx</sup></i> + TAM                                                     | 50% CD4+; 15%<br>CD4+ CD8+ | -                 | -                 | -       | -       | -                   | -       | -                  | -       | -       | -       | -       | -       | - |
| <i>UBC-cre/ERT2</i> ;<br><i>Cic<sup>flx/flx</sup></i> + TAM                                                     | 70% CD4+; 30%<br>CD4+ CD8+ | -                 | -                 | -       | -       | -                   | -       | -                  | -       | -       | -       | -       | -       | - |
| <i>UBC-cre/ERT2</i> ;<br><i>Cic<sup>flx/flx</sup></i> + TAM                                                     | CD4+ CD8+                  | -                 | -                 | -       | -       | -                   | -       | -                  | -       | -       | -       | -       | -       | - |
| <i>UBC-cre/ERT2</i> ;<br><i>Cic<sup>flx/flx</sup></i> as donor cells<br>in bone marrow<br>transplantation + TAM | CD4+                       | -                 | -                 | -       | -       | -                   | -       | -                  | -       | -       | -       | -       | -       | - |
| <i>UBC-cre/ERT2</i> ;<br><i>Cic<sup>flx/flx</sup></i> as donor cells<br>in bone marrow<br>transplantation + TAM | CD4+ CD8+                  | -                 | -                 | -       | -       | -                   | -       | -                  | -       | -       | -       | -       | -       | - |
| <i>UBC-cre/ERT2</i> ;<br><i>Cic<sup>flx/flx</sup></i> as donor cells<br>in bone marrow<br>transplantation + TAM | CD4+ CD8+                  | -                 | -                 | -       | -       | -                   | -       | -                  | -       | -       | -       | -       | -       | - |

**Table S4. Sanger sequencing results for *Cic*-null tumors.**

| NAME                                       | SIZE | NES       | FDR q-val  | RANK AT MAX | LEADING EDGE                    |
|--------------------------------------------|------|-----------|------------|-------------|---------------------------------|
| HALLMARK_MYC_TARGETS_V2                    | 58   | 3.1735077 | 0          | 3964        | tags=76%, list=14%, signal=89%  |
| HALLMARK_MYC_TARGETS_V1                    | 197  | 3.092106  | 0          | 7434        | tags=69%, list=27%, signal=94%  |
| HALLMARK_E2F_TARGETS                       | 193  | 2.7405202 | 0          | 8175        | tags=61%, list=30%, signal=87%  |
| HALLMARK_MTORC1_SIGNALING                  | 193  | 2.252036  | 0          | 6426        | tags=47%, list=24%, signal=61%  |
| HALLMARK_UNFOLDED_PROTEIN_RESPONSE         | 111  | 2.198831  | 0          | 8969        | tags=64%, list=33%, signal=95%  |
| HALLMARK_OXIDATIVE_PHOSPHORYLATION         | 192  | 2.0776792 | 0          | 9980        | tags=66%, list=37%, signal=103% |
| HALLMARK_G2M_CHECKPOINT                    | 190  | 1.9681258 | 0.00177362 | 8087        | tags=52%, list=30%, signal=73%  |
| HALLMARK_DNA_REPAIR                        | 135  | 1.6385499 | 0.01130314 | 9187        | tags=51%, list=34%, signal=77%  |
| HALLMARK_NOTCH_SIGNALING                   | 31   | 1.422112  | 0.03460204 | 3572        | tags=35%, list=13%, signal=41%  |
|                                            |      |           |            |             |                                 |
| HALLMARK_PANCREAS_BETA_CELLS               | 32   | 2.0755568 | 0          | 3988        | tags=53%, list=15%, signal=62%  |
| HALLMARK_KRAS_SIGNALING_DN                 | 173  | 1.9046242 | 0          | 5207        | tags=47%, list=19%, signal=58%  |
| HALLMARK_APICAL_SURFACE                    | 42   | 1.6856445 | 0.00433567 | 5105        | tags=43%, list=19%, signal=53%  |
| HALLMARK_EPITHELIAL_MESENCHYMAL_TRANSITION | 190  | 1.5927907 | 0.0122265  | 6273        | tags=42%, list=23%, signal=54%  |
| HALLMARK_MYOGENESIS                        | 193  | -1.523915 | 0.02601156 | 6362        | tags=39%, list=23%, signal=50%  |
| HALLMARK_APICAL_JUNCTION                   | 187  | 1.4613552 | 0.04909184 | 7068        | tags=37%, list=26%, signal=50%  |
| HALLMARK_ESTROGEN_RESPONSE_LATE            | 187  | 1.4171898 | 0.07061846 | 5620        | tags=32%, list=21%, signal=40%  |
| HALLMARK_COAGULATION                       | 121  | -1.379649 | 0.09866883 | 6438        | tags=36%, list=24%, signal=46%  |

**Table S5. Gene set enrichment analysis (GSEA) for transcriptional profiles in *Cic*-null tumors.**
